# Supplementary material
Source: HighWire-hosted journal article supplement (https://emj.bmj.com/content/41/1/4)
Supplement: inline-supplementary-material-1 [file inline-supplementary-material-1.pdf]

## Supplementary material

Table 1. Statements achieving consensus in round 2.

| Broad question | Statement for voting                                                                                                                                                                                                                                                                      | Disagree | Agree | Median | Outcome |
|----------------|-------------------------------------------------------------------------------------------------------------------------------------------------------------------------------------------------------------------------------------------------------------------------------------------|----------|-------|--------|---------|
| Question 1     | <b>Statement 1:</b> All first response professionals should understand that Acute Behavioural Disturbance does not denote a specific diagnosis.                                                                                                                                           | 8%       | 92%   | 7      | agree   |
| Question 1     | <b>Statement 2:</b> All first response professionals should understand that patients presenting with rapid physical deterioration and agitated behaviour should have a focus on management of their physical health.                                                                      | 8%       | 88%   | 7      | agree   |
| Question 1     | <b>Statement 3:</b> There should be a focus on physical health monitoring for evidence of deterioration, use of de-escalation techniques, and early transportation to a healthcare facility if there is evidence of deterioration.                                                        | 0%       | 100%  | 7      | agree   |
| Question 1     | <b>Statement 4:</b> Officers should have a high index of suspicion and therefore a low threshold to divert to a health rather than a custody setting.                                                                                                                                     | 4%       | 92%   | 7      | agree   |
| Question 1     | <b>Statement 5:</b> The triad of being hot to touch (tactile hyperthermia), exhibiting constant or near constant activity, and extreme agitation or aggression should be the focus of recognition, as the majority of other described signs and symptoms arise as a consequence of these. | 4%       | 88%   | 6      | agree   |
| Question 1     | <b>Statement 11:</b> The person is hot to touch                                                                                                                                                                                                                                           | 13%      | 79%   | 6      | agree   |
| Question 1     | <b>Statement 15:</b> The person has a raised heart rate                                                                                                                                                                                                                                   | 17%      | 79%   | 6      | agree   |
| Question 1     | <b>Statement 17:</b> The person is exhibiting constant physical activity                                                                                                                                                                                                                  | 8%       | 83%   | 6      | agree   |
| Question 1     | <b>Statement 18:</b> The person is exhibiting near constant physical activity                                                                                                                                                                                                             | 4%       | 96%   | 6      | agree   |
| Question 1     | <b>Statement 19:</b> The person is exhibiting extreme agitation                                                                                                                                                                                                                           | 4%       | 96%   | 6      | agree   |
| Question 1     | <b>Statement 20:</b> The person is exhibiting extreme aggression                                                                                                                                                                                                                          | 13%      | 79%   | 6      | agree   |
| Question 1     | <b>Statement 34:</b> The person's presentation of aggression or hostility appears atypical                                                                                                                                                                                                | 13%      | 88%   | 6      | agree   |
| Question 1     | <b>Statement 37:</b> The person is unable to sit or stand still                                                                                                                                                                                                                           | 17%      | 75%   | 5      | agree   |
| Question 1     | <b>Statement 57:</b> Live-feed of officer's body worn video to specifically trained individuals in force control rooms may be helpful.                                                                                                                                                    | 4%       | 79%   | 6      | agree   |
| Question 2     | <b>Statement 1:</b> Custody staff should be trained to recognise a patient who is at high risk of deteriorating early.                                                                                                                                                                    | 4%       | 96%   | 7      | agree   |
| Question 2     | <b>Statement 2:</b> Healthcare staff should be aware that restraint may worsen a patient's condition.                                                                                                                                                                                     | 4%       | 96%   | 7      | agree   |
| Question 2     | <b>Statement 3:</b> It is vital that healthcare staff have plans regarding the management of patients presenting with ABD until emergency care has arrived, including de-escalation.                                                                                                      | 0%       | 100%  | 7      | agree   |
| Question 2     | <b>Statement 4:</b> Emergency equipment should be readily available in environments which may be required to care for people presenting with ABD.                                                                                                                                         | 0%       | 100%  | 7      | agree   |
| Question 2     | <b>Statement 5:</b> The combination of physical health deterioration and behavioural disorganisation is likely to need emergency medical care.                                                                                                                                            | 0%       | 100%  | 7      | agree   |
| Question 2     | <b>Statement 14:</b> The person is hot to touch                                                                                                                                                                                                                                           | 17%      | 79%   | 6      | agree   |
| Question 2     | <b>Statement 15:</b> The person is sweating profusely                                                                                                                                                                                                                                     | 17%      | 75%   | 5      | agree   |

|            |                                                                                                                                                                                                                                                     |     |     |     |       |
|------------|-----------------------------------------------------------------------------------------------------------------------------------------------------------------------------------------------------------------------------------------------------|-----|-----|-----|-------|
| Question 2 | <b>Statement 18:</b> The person has a high temperature                                                                                                                                                                                              | 8%  | 92% | 6   | agree |
| Question 2 | <b>Statement 25:</b> The person has a raised heart rate                                                                                                                                                                                             | 13% | 88% | 6   | agree |
| Question 2 | <b>Statement 28:</b> The person has raised breathing rate and heart rate                                                                                                                                                                            | 13% | 75% | 6   | agree |
| Question 2 | <b>Statement 29:</b> The person has autonomic dysfunction                                                                                                                                                                                           | 13% | 83% | 6   | agree |
| Question 2 | <b>Statement 33:</b> The person is exhibiting constant physical activity                                                                                                                                                                            | 4%  | 96% | 6   | agree |
| Question 2 | <b>Statement 34:</b> The person is exhibiting near constant physical activity                                                                                                                                                                       | 4%  | 88% | 6   | agree |
| Question 2 | <b>Statement 35:</b> The person is exhibiting near constant physical activity including aggressive/violent behaviours                                                                                                                               | 0%  | 96% | 6   | agree |
| Question 2 | <b>Statement 37:</b> The person does not appear to tire                                                                                                                                                                                             | 22% | 78% | 5   | agree |
| Question 2 | <b>Statement 38:</b> The person is exhibiting extreme agitation                                                                                                                                                                                     | 4%  | 92% | 6   | agree |
| Question 2 | <b>Statement 42:</b> The person is agitated and not interacting or understanding verbal commands                                                                                                                                                    | 17% | 75% | 5.5 | agree |
| Question 2 | <b>Statement 43:</b> The person is exhibiting extreme agitation, which fails to settle with de-escalation techniques, and physiological derangement                                                                                                 | 8%  | 88% | 6.5 | agree |
| Question 2 | <b>Statement 44:</b> The person is exhibiting severe agitation with a risk of violence                                                                                                                                                              | 4%  | 88% | 6   | agree |
| Question 2 | <b>Statement 45:</b> The person is exhibiting extreme aggression                                                                                                                                                                                    | 13% | 79% | 6   | agree |
| Question 2 | <b>Statement 47:</b> The person is exhibiting aggression without reason                                                                                                                                                                             | 13% | 75% | 5   | agree |
| Question 2 | <b>Statement 61:</b> The person is restrained for 15 minutes without resolution or de-escalation                                                                                                                                                    | 17% | 75% | 5   | agree |
| Question 2 | <b>Statement 62:</b> The person is likely to have ingested stimulant drugs                                                                                                                                                                          | 4%  | 75% | 6   | agree |
| Question 2 | <b>Statement 74:</b> The person is exhibiting severe delirium                                                                                                                                                                                       | 4%  | 79% | 6   | agree |
| Question 2 | <b>Statement 87:</b> The person appears paranoid                                                                                                                                                                                                    | 14% | 77% | 5.5 | agree |
| Question 2 | <b>Statement 88:</b> The person appears hyper vigilant                                                                                                                                                                                              | 13% | 79% | 5.5 | agree |
| Question 2 | <b>Statement 101:</b> The person does not respond to de-escalation                                                                                                                                                                                  | 8%  | 75% | 5   | agree |
| Question 2 | <b>Statement 117:</b> Medical / nursing staff have additional skills, training and potentially the opportunity to undertake assessment / screening which could assist in negating the consideration around ABD or better understand it's causation. | 8%  | 75% | 6   | agree |
| Question 2 | <b>Statement 118:</b> Observable features should have slightly more detail for healthcare staff                                                                                                                                                     | 4%  | 79% | 5.5 | agree |
| Question 3 | <b>Statement 2:</b> There should be a focus on objective findings: agitation, confusion/disorientation, high anxiety/hyper vigilance/fearfulness/panic, increased physical activity, hot to touch/sweating, tachypnoea, tachycardia.                | 4%  | 88% | 6   | agree |

|            |                                                                                                                                                                  |     |     |     |       |
|------------|------------------------------------------------------------------------------------------------------------------------------------------------------------------|-----|-----|-----|-------|
| Question 3 | <b>Statement 4:</b> Healthcare professionals have a responsibility to differentiate the cause of the patient's presentation.                                     | 8%  | 75% | 6   | agree |
| Question 3 | <b>Statement 7:</b> Behaviours that would appear disproportionate to the situation presented (e.g. hyper-arousal)                                                | 4%  | 83% | 5   | agree |
| Question 3 | <b>Statement 9:</b> The person appears severely agitated (unprovoked, or with little provocation)                                                                | 4%  | 92% | 5.5 | agree |
| Question 3 | <b>Statement 10:</b> The person appears severely agitated for a prolonged period of time                                                                         | 4%  | 91% | 6   | agree |
| Question 3 | <b>Statement 11:</b> Police or law enforcement restraint for over 15 minutes                                                                                     | 13% | 78% | 6   | agree |
| Question 3 | <b>Statement 12:</b> The person has ongoing agitation and is not amenable to verbal or other de-escalation methods                                               | 4%  | 92% | 6   | agree |
| Question 3 | <b>Statement 13:</b> The person has psychomotor agitation                                                                                                        | 4%  | 75% | 6   | agree |
| Question 3 | <b>Statement 16:</b> The person has constant or near constant physical activity                                                                                  | 4%  | 88% | 6   | agree |
| Question 3 | <b>Statement 17:</b> The person displays inappropriate behaviour and unresponsiveness to those present                                                           | 17% | 75% | 5   | agree |
| Question 3 | <b>Statement 19:</b> The person is mentally distressed including the potential to harm themselves or another person                                              | 8%  | 79% | 5   | agree |
| Question 3 | <b>Statement 23:</b> The person exhibits an acute deterioration in their condition                                                                               | 0%  | 96% | 6   | agree |
| Question 3 | <b>Statement 24:</b> The person has an ongoing need for sedation management                                                                                      | 4%  | 92% | 6   | agree |
| Question 3 | <b>Statement 27:</b> The person has abnormal content of consciousness (includes mood, observed behaviour -restlessness, catatonic, agitation etc, and cognition) | 21% | 79% | 6   | agree |
| Question 3 | <b>Statement 32:</b> The person exhibits a sympathomimetic toxidrome                                                                                             | 13% | 75% | 6   | agree |
| Question 3 | <b>Statement 33:</b> The person is sweating excessively                                                                                                          | 8%  | 88% | 5.5 | agree |
| Question 3 | <b>Statement 34:</b> Temperature (hyperthermia) and associated symptoms such as removal of clothing                                                              | 4%  | 83% | 6   | agree |
| Question 3 | <b>Statement 35:</b> The person is hot to touch                                                                                                                  | 4%  | 88% | 6   | agree |
| Question 3 | <b>Statement 36:</b> The person has a raised respiratory rate                                                                                                    | 8%  | 83% | 6   | agree |
| Question 3 | <b>Statement 37:</b> The person has a respiratory rate > 30/min                                                                                                  | 4%  | 79% | 6   | agree |
| Question 3 | <b>Statement 38:</b> The person has a raised respiratory rate and increased respiratory effort                                                                   | 13% | 75% | 6   | agree |
| Question 3 | <b>Statement 39:</b> The person has a raised pulse rate                                                                                                          | 13% | 83% | 5   | agree |
| Question 3 | <b>Statement 40:</b> The person has a heart rate > 120/min                                                                                                       | 13% | 83% | 6   | agree |
| Question 3 | <b>Statement 41:</b> The person has a heart rate > 150/min                                                                                                       | 17% | 75% | 7   | agree |
| Question 3 | <b>Statement 43:</b> The person has a systolic blood pressure >180-200mmHg                                                                                       | 25% | 75% | 6   | agree |

|            |                                                                                                                                                                                                                                                              |     |      |     |       |
|------------|--------------------------------------------------------------------------------------------------------------------------------------------------------------------------------------------------------------------------------------------------------------|-----|------|-----|-------|
| Question 3 | <b>Statement 53:</b> The person has an ongoing need for sedation at higher doses than would typically be expected                                                                                                                                            | 8%  | 88%  | 6   | agree |
| Question 4 | <b>Statement 1:</b> A focus on appropriate recognition of ABD (rather than how to discharge patients from ABD guidance) may help prevent this scenario.                                                                                                      | 4%  | 87%  | 6   | agree |
| Question 4 | <b>Statement 2:</b> If a likely diagnosis or condition is present, then that should be treated, but there may be a role for using ABD guidance in conjunction.                                                                                               | 4%  | 88%  | 5   | agree |
| Question 4 | <b>Statement 3:</b> ABD is not a diagnosis, and recognition of a presentation of ABD does not stop other clinical guidelines becoming relevant if a possible, probable or definitive diagnosis is made.                                                      | 4%  | 96%  | 7   | agree |
| Question 4 | <b>Statement 4:</b> If the patient's baseline state cannot be determined from personal experience, collateral history, or medical records, the default should be to assume the abnormal behaviour is acute.                                                  | 4%  | 92%  | 6   | agree |
| Question 4 | <b>Statement 5:</b> It is not helpful to have separate guidance for 'agitation' and 'ABD'. Rather, a history should be taken and assessment of the level of agitation should be made. Treatment should be based on the level of agitation and clinical risk. | 8%  | 75%  | 5   | agree |
| Question 4 | <b>Statement 6:</b> Evidence of rapid and significant physical or physiological deterioration along with agitation or confusion should lead to urgent medical assessment and management. Other descriptors are not specific.                                 | 4%  | 96%  | 6   | agree |
| Question 4 | <b>Statement 7:</b> Regardless of the terminology used, restraint and sedation should always be a last resort. The first response to any acutely distressed or agitated person should be non-physical approaches, including de-escalation.                   | 0%  | 100% | 7   | agree |
| Question 4 | <b>Statement 17:</b> The patient is able to communicate their experiences.                                                                                                                                                                                   | 9%  | 78%  | 5   | agree |
| Question 5 | <b>Statement 1:</b> When professionals believe the Acute Behavioural Disturbance criteria are met, the person should always be moved to an Emergency Department for assessment, as an emergency                                                              | 8%  | 83%  | 6   | agree |
| Question 5 | <b>Statement 2:</b> No one sign or symptom should be used in isolation regarding this presentation, the clinical history and preceding events should be used to build a clinical picture                                                                     | 0%  | 96%  | 6   | agree |
| Question 5 | <b>Statement 5:</b> There is a triad of tactile hyperthermia, extreme agitation/aggression, constant/near constant activity                                                                                                                                  | 17% | 83%  | 6   | agree |
| Question 5 | <b>Statement 6:</b> The presentation has been prolonged                                                                                                                                                                                                      | 17% | 79%  | 5   | agree |
| Question 5 | <b>Statement 8:</b> Prolonged restraint has been used                                                                                                                                                                                                        | 13% | 83%  | 6   | agree |
| Question 5 | <b>Statement 9:</b> The person is restrained for 15 minutes without resolution or de-escalation                                                                                                                                                              | 13% | 87%  | 6   | agree |
| Question 5 | <b>Statement 10:</b> If there is continued use of force with a high degree of resistance, with features of ABD                                                                                                                                               | 0%  | 100% | 7   | agree |
| Question 5 | <b>Statement 13:</b> A sudden change in rate or depth of breathing                                                                                                                                                                                           | 8%  | 83%  | 6.5 | agree |
| Question 5 | <b>Statement 14:</b> There is behavioural disturbance with clear indication of key drug use, such as cocaine, stimulants, phencyclidine (PCP) or lysergic acid diethylamide (LSD).                                                                           | 4%  | 83%  | 6   | agree |
| Question 5 | <b>Statement 16:</b> There is an inability to safely manage the risk to self or others                                                                                                                                                                       | 8%  | 92%  | 7   | agree |
| Question 5 | <b>Statement 17:</b> The person is a risk to themselves or others                                                                                                                                                                                            | 8%  | 88%  | 6   | agree |
| Question 5 | <b>Statement 18:</b> The person has a potential to harm themselves or others                                                                                                                                                                                 | 21% | 75%  | 6   | agree |
| Question 5 | <b>Statement 19:</b> There is persistent agitation                                                                                                                                                                                                           | 8%  | 83%  | 5   | agree |
| Question 5 | <b>Statement 20:</b> The person is exhibiting extreme agitation                                                                                                                                                                                              | 4%  | 92%  | 6   | agree |

|            |                                                                                                                                                                                                                                                          |     |      |     |       |
|------------|----------------------------------------------------------------------------------------------------------------------------------------------------------------------------------------------------------------------------------------------------------|-----|------|-----|-------|
| Question 5 | <b>Statement 21:</b> The person is exhibiting constant physical activity                                                                                                                                                                                 | 4%  | 88%  | 6   | agree |
| Question 5 | <b>Statement 22:</b> The person is exhibiting near constant physical activity                                                                                                                                                                            | 4%  | 83%  | 6   | agree |
| Question 5 | <b>Statement 25:</b> The person has hyperactivity and agitation that cannot be controlled without medication                                                                                                                                             | 9%  | 91%  | 6   | agree |
| Question 5 | <b>Statement 26:</b> The person is exhibiting extreme agitation, which fails to settle with de-escalation techniques, and has caused marked exertion such as active restraint or physiological derangement                                               | 4%  | 92%  | 6.5 | agree |
| Question 5 | <b>Statement 27:</b> The person is exhibiting extreme aggression                                                                                                                                                                                         | 8%  | 83%  | 5.5 | agree |
| Question 5 | <b>Statement 28:</b> The person is exhibiting aggression and unable to calm with de-escalation                                                                                                                                                           | 8%  | 79%  | 6   | agree |
| Question 5 | <b>Statement 32:</b> There is abnormality in primary survey (airway, breathing, circulation, disability), abnormal vital signs (using parameters appropriate for age and co-morbidities), abnormal capillary blood glucose or abnormal electrocardiogram | 0%  | 96%  | 7   | agree |
| Question 5 | <b>Statement 33:</b> The person has any airway, breathing or circulation problem                                                                                                                                                                         | 4%  | 92%  | 7   | agree |
| Question 5 | <b>Statement 35:</b> The person is sweating profusely                                                                                                                                                                                                    | 17% | 75%  | 5   | agree |
| Question 5 | <b>Statement 38:</b> The person has a high temperature                                                                                                                                                                                                   | 4%  | 96%  | 6   | agree |
| Question 5 | <b>Statement 39:</b> The person has a temperature over 39 degrees Celsius                                                                                                                                                                                | 0%  | 100% | 7   | agree |
| Question 5 | <b>Statement 40:</b> The person is breathing rapidly                                                                                                                                                                                                     | 0%  | 100% | 6   | agree |
| Question 5 | <b>Statement 41:</b> The person is breathing at over 30 breaths per minute                                                                                                                                                                               | 4%  | 92%  | 6   | agree |
| Question 5 | <b>Statement 43:</b> The person has a raised breathing effort/is breathless                                                                                                                                                                              | 8%  | 79%  | 6   | agree |
| Question 5 | <b>Statement 44:</b> The person has a raised heart rate                                                                                                                                                                                                  | 13% | 79%  | 5   | agree |
| Question 5 | <b>Statement 45:</b> The person has a heart rate over 120 beats per minute                                                                                                                                                                               | 8%  | 92%  | 6   | agree |
| Question 5 | <b>Statement 46:</b> The person has a heart rate over 150 beats per minute                                                                                                                                                                               | 4%  | 92%  | 7   | agree |
| Question 5 | <b>Statement 47:</b> The person has a heart rate over 160 beats per minute                                                                                                                                                                               | 4%  | 92%  | 7   | agree |
| Question 5 | <b>Statement 48:</b> The person has a systolic blood pressure over 180mmHg                                                                                                                                                                               | 8%  | 83%  | 6   | agree |
| Question 5 | <b>Statement 49:</b> The person has a systolic blood pressure over 200mmHg                                                                                                                                                                               | 8%  | 88%  | 7   | agree |
| Question 5 | <b>Statement 50:</b> The person has clonus                                                                                                                                                                                                               | 13% | 83%  | 7   | agree |
| Question 5 | <b>Statement 51:</b> The person has chest pain                                                                                                                                                                                                           | 8%  | 92%  | 7   | agree |
| Question 5 | <b>Statement 52:</b> The person has low blood pressure                                                                                                                                                                                                   | 17% | 83%  | 5.5 | agree |

|            |                                                                                                                                                                           |     |     |     |       |
|------------|---------------------------------------------------------------------------------------------------------------------------------------------------------------------------|-----|-----|-----|-------|
| Question 5 | <b>Statement 53:</b> The person has a cardiac arrest                                                                                                                      | 0%  | 96% | 7   | agree |
| Question 5 | <b>Statement 54:</b> The person has a collapse                                                                                                                            | 4%  | 96% | 7   | agree |
| Question 5 | <b>Statement 55:</b> The person has seizures                                                                                                                              | 0%  | 96% | 7   | agree |
| Question 5 | <b>Statement 56:</b> The person has low oxygen concentrations                                                                                                             | 4%  | 96% | 7   | agree |
| Question 5 | <b>Statement 57:</b> The person has episodes of loss of consciousness                                                                                                     | 4%  | 96% | 7   | agree |
| Question 5 | <b>Statement 58:</b> The person has episodes of change of colour                                                                                                          | 17% | 75% | 6   | agree |
| Question 5 | <b>Statement 59:</b> The person has physical injury to self                                                                                                               | 13% | 75% | 6   | agree |
| Question 5 | <b>Statement 71:</b> The person is unresponsive                                                                                                                           | 4%  | 96% | 7   | agree |
| Question 5 | <b>Statement 72:</b> The person is not responsive to voice                                                                                                                | 9%  | 83% | 6   | agree |
| Question 5 | <b>Statement 74:</b> The person has a Glasgow Coma Score below or equal to 8                                                                                              | 4%  | 92% | 7   | agree |
| Question 5 | <b>Statement 75:</b> The person is confused                                                                                                                               | 17% | 79% | 5.5 | agree |
| Question 5 | <b>Statement 80:</b> The person has signs of airway obstruction                                                                                                           | 4%  | 92% | 7   | agree |
| Question 5 | <b>Statement 81:</b> The person is unable to clear vomitus or secretion                                                                                                   | 4%  | 96% | 7   | agree |
| Question 5 | <b>Statement 82:</b> The person has evidence of acute kidney injury, hyperkalaemia, or lactate over 4mmol/L on blood tests                                                | 0%  | 88% | 7   | agree |
| Question 6 | <b>Statement 1:</b> ABD presentations require an emergency response                                                                                                       | 0%  | 92% | 6   | agree |
| Question 6 | <b>Statement 2:</b> All patients with a presentation of ABD require urgent healthcare provider input                                                                      | 0%  | 92% | 6   | agree |
| Question 6 | <b>Statement 3:</b> ABD presentations cannot wait 2 hours for assessment                                                                                                  | 8%  | 79% | 6   | agree |
| Question 6 | <b>Statement 5:</b> Fever, prolonged and excessive physical hyperactivity or restraint, episodes of loss of consciousness or change in colour, low oxygen concentrations. | 23% | 77% | 7   | agree |
| Question 6 | <b>Statement 8:</b> Person presenting with the triad of tactile hyperthermia, extreme agitation, or aggression and near constant physical activity                        | 13% | 78% | 6   | agree |
| Question 6 | <b>Statement 10:</b> Person with the presence of physiological hyper arousal along with symptoms of delirium should lead to urgent healthcare input.                      | 13% | 87% | 6   | agree |
| Question 6 | <b>Statement 23:</b> Person has an elevated heart rate                                                                                                                    | 22% | 78% | 5   | agree |
| Question 6 | <b>Statement 24:</b> Person has a severely high blood pressure                                                                                                            | 22% | 78% | 6   | agree |
| Question 6 | <b>Statement 29:</b> Any deterioration in the person's health                                                                                                             | 13% | 79% | 5.5 | agree |
| Question 7 | <b>Statement 1:</b> ABD presentations require an emergency response.                                                                                                      | 13% | 75% | 6   | agree |

|                                                                                             |                                                                                                                                                                                                                                                                                                                                                           |     |     |     |          |
|---------------------------------------------------------------------------------------------|-----------------------------------------------------------------------------------------------------------------------------------------------------------------------------------------------------------------------------------------------------------------------------------------------------------------------------------------------------------|-----|-----|-----|----------|
| Question 7                                                                                  | <b>Statement 2:</b> ABD presentations should always be assessed within 2 hours.                                                                                                                                                                                                                                                                           | 13% | 75% | 6   | agree    |
| Question 7                                                                                  | <b>Statement 3:</b> ABD presentations cannot wait 4 hours for assessment.                                                                                                                                                                                                                                                                                 | 4%  | 83% | 6.5 | agree    |
| Question 7                                                                                  | <b>Statement 5:</b> Person who initially presented with high-risk features but has subsequently improved.                                                                                                                                                                                                                                                 | 4%  | 83% | 5   | agree    |
| Question 7                                                                                  | <b>Statement 6:</b> Person with mild agitation.                                                                                                                                                                                                                                                                                                           | 13% | 83% | 5   | agree    |
| Question 7                                                                                  | <b>Statement 7:</b> Person able to be settled by family or friends.                                                                                                                                                                                                                                                                                       | 9%  | 87% | 6   | agree    |
| Question 7                                                                                  | <b>Statement 14:</b> Person who has received a normal primary survey (airway, breathing, circulation, disability), normal vital signs (using parameters appropriate for age and co-morbidities), normal capillary blood glucose and a normal electrocardiogram in a patient with previous abnormal behaviour could have a subsequent non-urgent response. | 0%  | 87% | 5   | agree    |
| Question 8                                                                                  | <b>Statement 1:</b> Acute Behavioural Disturbance is always a medical emergency.                                                                                                                                                                                                                                                                          | 17% | 78% | 6   | agree    |
| Question 8                                                                                  | <b>Statement 9:</b> Observation in police custody would only be safe following diagnosis of the cause of the ABD and return of temperature, pulse, respiratory rate and other clinical parameters to acceptable levels having been monitored in a setting with full resuscitation facilities.                                                             | 9%  | 78% | 5   | agree    |
| Question 8                                                                                  | <b>Statement 28:</b> The person has returned to near baseline and is compliant with interventions.                                                                                                                                                                                                                                                        | 5%  | 91% | 6   | agree    |
| Question 8                                                                                  | <b>Statement 29:</b> The person responds to de-escalation.                                                                                                                                                                                                                                                                                                | 9%  | 86% | 5   | agree    |
| Question 8                                                                                  | <b>Statement 30:</b> The person's agitation or violence improves with simple measures                                                                                                                                                                                                                                                                     | 5%  | 86% | 5   | agree    |
| Question 8                                                                                  | <b>Statement 33:</b> There is decreasing agitation                                                                                                                                                                                                                                                                                                        | 0%  | 77% | 5   | agree    |
| Question 1                                                                                  | <b>Statement 58:</b> There is no valid and accepted definition and we therefore cannot describe the features.                                                                                                                                                                                                                                             | 87% | 13% | 2   | disagree |
| Question 2                                                                                  | <b>Statement 9:</b> Individual descriptors are insufficient. The person should be exhibiting all consensus features.                                                                                                                                                                                                                                      | 75% | 13% | 2   | disagree |
| Question 2                                                                                  | <b>Statement 13:</b> The only features that should be considered are objective and measurable ones such as pulse, temperature, blood pressure and any blood tests possible.                                                                                                                                                                               | 88% | 8%  | 2   | disagree |
| NB: All non-consensus statements entered round 3, and are therefore represented in table 2. |                                                                                                                                                                                                                                                                                                                                                           |     |     |     |          |

Table 2. Statement outcomes in round 3.

| Broad question | Statement for voting                                                       | Disagree | Agree | Median | Outcome |
|----------------|----------------------------------------------------------------------------|----------|-------|--------|---------|
| Question 2     | <b>Statement 21:</b> The person is breathing rapidly                       | 17%      | 79%   | 6      | agree   |
| Question 2     | <b>Statement 26:</b> The person has a heart rate over 120 beats per minute | 4%       | 88%   | 6      | agree   |
| Question 2     | <b>Statement 36:</b> The person has an abnormal level of physical activity | 4%       | 88%   | 6      | agree   |
| Question 2     | <b>Statement 39:</b> The person is exhibiting agitation                    | 4%       | 88%   | 5.5    | agree   |

|            |                                                                                                                                                                   |     |     |   |       |
|------------|-------------------------------------------------------------------------------------------------------------------------------------------------------------------|-----|-----|---|-------|
| Question 2 | <b>Statement 40:</b> The person is unable to calm down                                                                                                            | 5%  | 95% | 6 | agree |
| Question 2 | <b>Statement 48:</b> The person is exhibiting extreme violence                                                                                                    | 0%  | 87% | 6 | agree |
| Question 2 | <b>Statement 49:</b> The person is exhibiting violent behaviour                                                                                                   | 4%  | 75% | 5 | agree |
| Question 2 | <b>Statement 56:</b> The person is constantly resisting restraints                                                                                                | 8%  | 75% | 5 | agree |
| Question 2 | <b>Statement 57:</b> The person is near-constantly resisting restraints                                                                                           | 13% | 79% | 5 | agree |
| Question 2 | <b>Statement 58:</b> The person has sustained non-compliance with police or ambulance staff                                                                       | 8%  | 79% | 5 | agree |
| Question 2 | <b>Statement 64:</b> The person is psychotic                                                                                                                      | 8%  | 75% | 5 | agree |
| Question 2 | <b>Statement 65:</b> The person has symptoms of acute psychosis with fear of impending doom                                                                       | 13% | 83% | 5 | agree |
| Question 2 | <b>Statement 69:</b> The features have a sudden onset                                                                                                             | 4%  | 83% | 5 | agree |
| Question 2 | <b>Statement 72:</b> The person is exhibiting behaviour that is reportedly not normal for them                                                                    | 4%  | 92% | 6 | agree |
| Question 2 | <b>Statement 73:</b> The person is exhibiting delirium                                                                                                            | 4%  | 88% | 6 | agree |
| Question 2 | <b>Statement 75:</b> The person is unable to sit or stand still                                                                                                   | 4%  | 83% | 5 | agree |
| Question 2 | <b>Statement 77:</b> The person has hyper-arousal                                                                                                                 | 0%  | 92% | 6 | agree |
| Question 2 | <b>Statement 83:</b> The person is disinhibited                                                                                                                   | 4%  | 83% | 5 | agree |
| Question 2 | <b>Statement 84:</b> The person has a rapid change in behaviour (especially if calm and cooperative previously)                                                   | 0%  | 78% | 5 | agree |
| Question 2 | <b>Statement 86:</b> The person appears to be experiencing hallucinations                                                                                         | 4%  | 75% | 5 | agree |
| Question 2 | <b>Statement 89:</b> The person exhibits atypical paranoia                                                                                                        | 4%  | 83% | 5 | agree |
| Question 2 | <b>Statement 91:</b> The person appears to be experiencing fear or panic                                                                                          | 8%  | 75% | 5 | agree |
| Question 2 | <b>Statement 93:</b> The person exhibits extreme anxiety                                                                                                          | 14% | 76% | 5 | agree |
| Question 2 | <b>Statement 100:</b> The person does not become calmer with verbal de-escalation                                                                                 | 4%  | 83% | 5 | agree |
| Question 2 | <b>Statement 103:</b> The person has an increased pain threshold/tolerance                                                                                        | 4%  | 78% | 5 | agree |
| Question 2 | <b>Statement 113:</b> The person has a lack of response to first line sedatives                                                                                   | 8%  | 92% | 5 | agree |
| Question 2 | <b>Statement 115:</b> The person has abnormal content of consciousness (includes mood, observed behaviour -restlessness, catatonic, agitation etc, and cognition) | 13% | 75% | 5 | agree |
| Question 2 | <b>Statement 116:</b> Phrases such as "superhuman strength" should not be used.                                                                                   | 9%  | 87% | 6 | agree |



|            |                                                                                                                                                                                                                                                                                           |     |     |     |       |
|------------|-------------------------------------------------------------------------------------------------------------------------------------------------------------------------------------------------------------------------------------------------------------------------------------------|-----|-----|-----|-------|
| Question 3 | <b>Statement 1:</b> The triad of being hot to touch (tactile hyperthermia), exhibiting constant or near constant activity, and extreme agitation or aggression should be the focus of recognition, as the majority of other described signs and symptoms arise as a consequence of these. | 0%  | 92% | 6   | agree |
| Question 3 | <b>Statement 3:</b> As ABD is not a diagnosis, national guidance should be directed towards the safe care of any acutely distressed person in custody.                                                                                                                                    | 24% | 76% | 5   | agree |
| Question 3 | <b>Statement 6:</b> Being unable to obtain observations (pulse/BP/oximetry/pupil size)                                                                                                                                                                                                    | 0%  | 75% | 5   | agree |
| Question 3 | <b>Statement 8:</b> The person appears agitated                                                                                                                                                                                                                                           | 0%  | 75% | 5   | agree |
| Question 3 | <b>Statement 15:</b> The person has an abnormal level of physical activity and/or inability to sit down/settle                                                                                                                                                                            | 4%  | 88% | 6   | agree |
| Question 3 | <b>Statement 18:</b> The person has ongoing paranoia                                                                                                                                                                                                                                      | 4%  | 79% | 5   | agree |
| Question 3 | <b>Statement 25:</b> The person's presentation is not explained by blood sugar issues                                                                                                                                                                                                     | 0%  | 78% | 5   | agree |
| Question 3 | <b>Statement 28:</b> The person has extreme/disproportionate strength                                                                                                                                                                                                                     | 21% | 75% | 5   | agree |
| Question 3 | <b>Statement 52:</b> The person does not respond to standard first-line sedative management                                                                                                                                                                                               | 4%  | 87% | 5   | agree |
| Question 4 | <b>Statement 12:</b> The absence of signs or symptoms of physiological disturbance on healthcare staff assessment.                                                                                                                                                                        | 8%  | 79% | 5   | agree |
| Question 4 | <b>Statement 13:</b> Additional information becomes available (e.g. psychiatric history identifies known schizophrenia) to which symptoms can be attributed.                                                                                                                              | 8%  | 79% | 5   | agree |
| Question 4 | <b>Statement 22:</b> It is identified that the patient's agitation was mostly provoked (e.g. by unjustifiable restraint or treatment).                                                                                                                                                    | 0%  | 92% | 5   | agree |
| Question 4 | <b>Statement 23:</b> The patient is responding to verbal de-escalation.                                                                                                                                                                                                                   | 0%  | 92% | 5   | agree |
| Question 4 | <b>Statement 24:</b> The person engages in > 60 seconds of consistent verbal communication, or focuses aggression at an individual, demonstrating perception of environment and persons around them.                                                                                      | 4%  | 75% | 5   | agree |
| Question 4 | <b>Statement 27:</b> It is identified that the patient is struggling to breathe                                                                                                                                                                                                           | 4%  | 79% | 5   | agree |
| Question 5 | <b>Statement 3:</b> The same criteria should be used as for anyone with acute agitation                                                                                                                                                                                                   | 8%  | 84% | 5   | agree |
| Question 5 | <b>Statement 11:</b> A sudden cessation of resistance                                                                                                                                                                                                                                     | 0%  | 96% | 6   | agree |
| Question 5 | <b>Statement 12:</b> The person suddenly becomes quiescent                                                                                                                                                                                                                                | 0%  | 96% | 6   | agree |
| Question 5 | <b>Statement 15:</b> There is evidence of drug use with a lack of signs of another cause of behavioural disturbance, such as head injury or diabetes.                                                                                                                                     | 0%  | 83% | 6   | agree |
| Question 5 | <b>Statement 23:</b> Prolonged and excessive activity                                                                                                                                                                                                                                     | 0%  | 88% | 5.5 | agree |
| Question 5 | <b>Statement 31:</b> The person is near-constantly resisting restraints                                                                                                                                                                                                                   | 4%  | 83% | 6   | agree |
| Question 5 | <b>Statement 34:</b> The person is hot to touch                                                                                                                                                                                                                                           | 8%  | 88% | 6   | agree |
| Question 5 | <b>Statement 42:</b> The person is unable to talk in full sentences                                                                                                                                                                                                                       | 4%  | 83% | 6   | agree |

|            |                                                                                                                                               |     |     |   |       |
|------------|-----------------------------------------------------------------------------------------------------------------------------------------------|-----|-----|---|-------|
| Question 5 | <b>Statement 63:</b> The person has any deterioration                                                                                         | 8%  | 92% | 6 | agree |
| Question 5 | <b>Statement 64:</b> The person appears psychotic                                                                                             | 8%  | 88% | 6 | agree |
| Question 5 | <b>Statement 66:</b> The person is exhibiting bizarre behaviour                                                                               | 13% | 79% | 5 | agree |
| Question 5 | <b>Statement 67:</b> The person is exhibiting bizarre thoughts                                                                                | 13% | 75% | 5 | agree |
| Question 5 | <b>Statement 70:</b> The person has hyper-arousal                                                                                             | 0%  | 83% | 5 | agree |
| Question 5 | <b>Statement 77:</b> The person is making incomprehensible sounds                                                                             | 0%  | 88% | 6 | agree |
| Question 5 | <b>Statement 78:</b> The person does not respond to de-escalation                                                                             | 4%  | 83% | 5 | agree |
| Question 5 | <b>Statement 83:</b> The person or circumstances present atypically                                                                           | 4%  | 75% | 5 | agree |
| Question 6 | <b>Statement 6:</b> Person presenting a risk to self or others                                                                                | 4%  | 92% | 6 | agree |
| Question 6 | <b>Statement 7:</b> Unable to settle despite basic healthcare measures and reassurance                                                        | 4%  | 88% | 5 | agree |
| Question 6 | <b>Statement 9:</b> Person exhibiting behaviours that would appear disproportionate to the situation presented eg hyper arousal               | 0%  | 88% | 5 | agree |
| Question 6 | <b>Statement 11:</b> Person with extreme agitation                                                                                            | 0%  | 92% | 5 | agree |
| Question 6 | <b>Statement 13:</b> Person with aggressive behaviour and an inability to remain still and/or calm the person with de-escalation techniques   | 0%  | 83% | 5 | agree |
| Question 6 | <b>Statement 14:</b> Person who does not respond to verbal distraction and initial responders feel situation is still high risk/ may escalate | 0%  | 88% | 5 | agree |
| Question 6 | <b>Statement 15:</b> Person with prolonged relentless or extreme physical exertion                                                            | 0%  | 88% | 5 | agree |
| Question 6 | <b>Statement 16:</b> Person requiring ongoing restraint and not listening to verbal commands                                                  | 0%  | 88% | 5 | agree |
| Question 6 | <b>Statement 17:</b> Person is unable to be deescalated                                                                                       | 0%  | 83% | 5 | agree |
| Question 6 | <b>Statement 18:</b> Person is hot to touch                                                                                                   | 4%  | 79% | 6 | agree |
| Question 6 | <b>Statement 19:</b> Person has excessive sweating                                                                                            | 8%  | 83% | 5 | agree |
| Question 6 | <b>Statement 21:</b> Person has constant or near constant physical activity                                                                   | 0%  | 88% | 5 | agree |
| Question 6 | <b>Statement 22:</b> Person has an increased breathing rate                                                                                   | 0%  | 92% | 5 | agree |
| Question 6 | <b>Statement 27:</b> Person appears disoriented (to place/person/time)                                                                        | 4%  | 79% | 5 | agree |
| Question 6 | <b>Statement 28:</b> If the person's initial symptoms have not started to resolve                                                             | 4%  | 79% | 5 | agree |
| Question 7 | <b>Statement 4:</b> Person without high-risk features who has unresolving symptoms of psychosis, disordered thought content, or confusion.    | 4%  | 83% | 5 | agree |

|            |                                                                                                                                        |      |     |   |              |
|------------|----------------------------------------------------------------------------------------------------------------------------------------|------|-----|---|--------------|
| Question 7 | <b>Statement 9:</b> Person responding coherently to voice.                                                                             | 0%   | 87% | 5 | agree        |
| Question 7 | <b>Statement 10:</b> Person who will sit down.                                                                                         | 9%   | 87% | 5 | agree        |
| Question 7 | <b>Statement 11:</b> Person who will eat or drink.                                                                                     | 0%   | 86% | 5 | agree        |
| Question 8 | <b>Statement 11:</b> The person's behaviour is proportionate to the situation.                                                         | 4%   | 78% | 5 | agree        |
| Question 8 | <b>Statement 12:</b> The person remains coherent and able to converse.                                                                 | 0%   | 87% | 5 | agree        |
| Question 8 | <b>Statement 13:</b> The person responds appropriately to verbal command.                                                              | 4%   | 83% | 5 | agree        |
| Question 8 | <b>Statement 14:</b> The person is able to give rational responses                                                                     | 0%   | 83% | 5 | agree        |
| Question 8 | <b>Statement 15:</b> The person has an absence of any previously described concerning features.                                        | 0%   | 91% | 5 | agree        |
| Question 8 | <b>Statement 32:</b> There is only a short period of agitation                                                                         | 4%   | 83% | 5 | agree        |
| Question 8 | <b>Statement 34:</b> The person is not exhibiting paranoia or a high level of agitation                                                | 0%   | 79% | 5 | agree        |
| Question 8 | <b>Statement 35:</b> Little or no restraint is used                                                                                    | 0%   | 78% | 5 | agree        |
| Question 1 | <b>Statement 7:</b> Individual descriptors are sufficient. The person may only be exhibiting one consensus feature.                    | 83%  | 4%  | 3 | disagree     |
| Question 1 | <b>Statement 10:</b> Individual descriptors are insufficient. The person should be exhibiting all consensus features.                  | 100% | 0%  | 2 | disagree     |
| Question 1 | <b>Statement 21:</b> The person is attracted to mirrors or glass                                                                       | 78%  | 9%  | 2 | disagree     |
| Question 1 | <b>Statement 22:</b> The person is destroying mirrors or glass                                                                         | 79%  | 8%  | 2 | disagree     |
| Question 2 | <b>Statement 6:</b> Individual descriptors are sufficient. The person may only be exhibiting one consensus feature.                    | 88%  | 4%  | 3 | disagree     |
| Question 2 | <b>Statement 27:</b> The person has a difficult to obtain wrist pulse                                                                  | 78%  | 9%  | 3 | disagree     |
| Question 2 | <b>Statement 51:</b> The person is destroying mirrors or glass                                                                         | 75%  | 8%  | 3 | disagree     |
| Question 2 | <b>Statement 98:</b> The person is exhibiting intolerance to light                                                                     | 75%  | 8%  | 3 | disagree     |
| Question 2 | <b>Statement 105:</b> The person has a vacant expression                                                                               | 92%  | 4%  | 3 | disagree     |
| Question 4 | <b>Statement 10:</b> The decision to move to alternative clinical guidance should only be made in an Emergency Department.             | 75%  | 8%  | 3 | disagree     |
| Question 4 | <b>Statement 34:</b> ABD guidance should not be applied at all, as these presentations are not a separate entity to general agitation. | 84%  | 8%  | 2 | disagree     |
| Question 8 | <b>Statement 4:</b> There is not an accepted definition of ABD, so this cannot be answered.                                            | 76%  | 16% | 2 | disagree     |
| Question 1 | <b>Statement 9:</b> Individual descriptors are insufficient. The person should be exhibiting most consensus features.                  | 17%  | 46% | 4 | no consensus |

|            |                                                                                                                                                        |     |     |     |              |
|------------|--------------------------------------------------------------------------------------------------------------------------------------------------------|-----|-----|-----|--------------|
| Question 1 | <b>Statement 13:</b> The person has inappropriately removed clothing                                                                                   | 33% | 42% | 4   | no consensus |
| Question 1 | <b>Statement 14:</b> The person is breathing rapidly                                                                                                   | 13% | 71% | 5   | no consensus |
| Question 1 | <b>Statement 16:</b> The person has wide dilated pupils                                                                                                | 33% | 29% | 4   | no consensus |
| Question 1 | <b>Statement 23:</b> The person suddenly becomes quiescent                                                                                             | 9%  | 65% | 5   | no consensus |
| Question 1 | <b>Statement 27:</b> The person expresses a fear of death                                                                                              | 46% | 25% | 4   | no consensus |
| Question 1 | <b>Statement 30:</b> The person is likely to be exhibiting a mental health presentation                                                                | 21% | 46% | 4   | no consensus |
| Question 1 | <b>Statement 31:</b> The person has symptoms of acute psychosis with fear of impending doom                                                            | 30% | 61% | 5   | no consensus |
| Question 1 | <b>Statement 32:</b> The person is a male age 15-50                                                                                                    | 21% | 21% | 4   | no consensus |
| Question 1 | <b>Statement 33:</b> The person expresses an impending sense of death                                                                                  | 33% | 25% | 4   | no consensus |
| Question 1 | <b>Statement 35:</b> The person appears irrational                                                                                                     | 25% | 46% | 4   | no consensus |
| Question 1 | <b>Statement 38:</b> The person is unable to engage in conversation                                                                                    | 21% | 38% | 4   | no consensus |
| Question 1 | <b>Statement 39:</b> The person has bizarre thoughts                                                                                                   | 33% | 33% | 4   | no consensus |
| Question 1 | <b>Statement 40:</b> The person appears to be experiencing hallucinations                                                                              | 29% | 38% | 4   | no consensus |
| Question 1 | <b>Statement 41:</b> The person is extremely paranoid                                                                                                  | 17% | 67% | 5   | no consensus |
| Question 1 | <b>Statement 42:</b> The person appears to be experiencing delusions                                                                                   | 21% | 58% | 5   | no consensus |
| Question 1 | <b>Statement 43:</b> The person is making incomprehensible sounds                                                                                      | 21% | 50% | 4.5 | no consensus |
| Question 1 | <b>Statement 44:</b> The person's speech is nonsensical                                                                                                | 25% | 38% | 4   | no consensus |
| Question 1 | <b>Statement 45:</b> The person is exhibiting excessive thirst                                                                                         | 33% | 21% | 4   | no consensus |
| Question 1 | <b>Statement 46:</b> The person is exhibiting intolerance to light                                                                                     | 71% | 8%  | 3   | no consensus |
| Question 1 | <b>Statement 47:</b> The person is not interacting with responders                                                                                     | 48% | 22% | 4   | no consensus |
| Question 1 | <b>Statement 50:</b> The person is tolerant of pain                                                                                                    | 8%  | 71% | 5   | no consensus |
| Question 1 | <b>Statement 53:</b> The person's behaviour is not explained by a medical condition                                                                    | 17% | 42% | 4   | no consensus |
| Question 1 | <b>Statement 54:</b> The person does not appear to be wilfully misbehaving.                                                                            | 25% | 38% | 4   | no consensus |
| Question 1 | <b>Statement 55:</b> The patient appears to lack mental capacity (within the meaning of the Mental Capacity Act 2005), as they are unable to (any of): | 13% | 67% | 5   | no consensus |

|            |                                                                                                                                                                          |     |     |   |              |
|------------|--------------------------------------------------------------------------------------------------------------------------------------------------------------------------|-----|-----|---|--------------|
|            | understand information relevant to the decision, retain that information, use or weigh up that information as part of the process of making the decision.                |     |     |   |              |
| Question 2 | <b>Statement 8:</b> Individual descriptors are insufficient. The person should be exhibiting most consensus features.                                                    | 21% | 38% | 4 | no consensus |
| Question 2 | <b>Statement 10:</b> There is insufficient evidence to use 'acute behavioural disturbance' as a unified descriptor.                                                      | 67% | 13% | 3 | no consensus |
| Question 2 | <b>Statement 11:</b> Using features such as unusual strength and lack of tiring increases the risk of racialising acute distress.                                        | 71% | 17% | 3 | no consensus |
| Question 2 | <b>Statement 12:</b> Using features such as unusual strength and lack of tiring increases the risk of life-threatening restraint situations, particularly for black men. | 54% | 29% | 3 | no consensus |
| Question 2 | <b>Statement 16:</b> The person has inappropriately removed clothing                                                                                                     | 8%  | 58% | 5 | no consensus |
| Question 2 | <b>Statement 17:</b> The person is inappropriately dressed                                                                                                               | 67% | 13% | 3 | no consensus |
| Question 2 | <b>Statement 19:</b> The person has mottled skin                                                                                                                         | 42% | 25% | 4 | no consensus |
| Question 2 | <b>Statement 20:</b> The person has excessively red appearing skin                                                                                                       | 33% | 33% | 4 | no consensus |
| Question 2 | <b>Statement 22:</b> The person is breathing at over 30 breaths per minute                                                                                               | 8%  | 71% | 6 | no consensus |
| Question 2 | <b>Statement 23:</b> The person is unable to talk in full sentences                                                                                                      | 25% | 46% | 4 | no consensus |
| Question 2 | <b>Statement 24:</b> The person has a raised breathing effort/is breathless                                                                                              | 9%  | 74% | 6 | no consensus |
| Question 2 | <b>Statement 30:</b> The person has delayed capillary refill time                                                                                                        | 29% | 13% | 4 | no consensus |
| Question 2 | <b>Statement 31:</b> The person has wide dilated pupils                                                                                                                  | 38% | 33% | 4 | no consensus |
| Question 2 | <b>Statement 32:</b> The person is restless                                                                                                                              | 13% | 58% | 5 | no consensus |
| Question 2 | <b>Statement 41:</b> The person is unable to settle                                                                                                                      | 14% | 57% | 5 | no consensus |
| Question 2 | <b>Statement 46:</b> The person is exhibiting aggression                                                                                                                 | 5%  | 73% | 5 | no consensus |
| Question 2 | <b>Statement 50:</b> The person is attracted to mirrors or glass                                                                                                         | 67% | 8%  | 3 | no consensus |
| Question 2 | <b>Statement 52:</b> The person suddenly becomes quiescent                                                                                                               | 22% | 35% | 4 | no consensus |
| Question 2 | <b>Statement 53:</b> The person appears disoriented (to place/person/time)                                                                                               | 9%  | 73% | 5 | no consensus |
| Question 2 | <b>Statement 54:</b> The person is exhibiting exceptional strength                                                                                                       | 14% | 73% | 5 | no consensus |
| Question 2 | <b>Statement 55:</b> The person is exhibiting unexpected strength                                                                                                        | 17% | 63% | 5 | no consensus |
| Question 2 | <b>Statement 59:</b> The person expresses a fear of death                                                                                                                | 33% | 33% | 4 | no consensus |
| Question 2 | <b>Statement 60:</b> The person has a fear of impending doom                                                                                                             | 33% | 46% | 4 | no consensus |

|            |                                                                                                |     |     |     |              |
|------------|------------------------------------------------------------------------------------------------|-----|-----|-----|--------------|
| Question 2 | <b>Statement 63:</b> The person has a history of recent drug use                               | 13% | 71% | 5.5 | no consensus |
| Question 2 | <b>Statement 66:</b> The person is a male age 15-50                                            | 13% | 33% | 4   | no consensus |
| Question 2 | <b>Statement 67:</b> The person expresses an impending sense of death                          | 38% | 38% | 4   | no consensus |
| Question 2 | <b>Statement 68:</b> The person or circumstances present atypically                            | 13% | 63% | 5   | no consensus |
| Question 2 | <b>Statement 70:</b> The person appears irrational                                             | 26% | 52% | 5   | no consensus |
| Question 2 | <b>Statement 71:</b> The person is exhibiting bizarre behaviour                                | 9%  | 61% | 5   | no consensus |
| Question 2 | <b>Statement 76:</b> The person is unable to engage in conversation                            | 13% | 39% | 4   | no consensus |
| Question 2 | <b>Statement 78:</b> The person has reduced consciousness                                      | 25% | 25% | 4   | no consensus |
| Question 2 | <b>Statement 79:</b> The person is not responding to voice                                     | 21% | 58% | 5   | no consensus |
| Question 2 | <b>Statement 80:</b> The person has a reduction in Glasgow Coma Scale score since presentation | 33% | 25% | 4   | no consensus |
| Question 2 | <b>Statement 81:</b> The person has incontinence                                               | 67% | 8%  | 3   | no consensus |
| Question 2 | <b>Statement 82:</b> The person is confused                                                    | 8%  | 71% | 5   | no consensus |
| Question 2 | <b>Statement 85:</b> The person has bizarre thoughts                                           | 4%  | 61% | 5   | no consensus |
| Question 2 | <b>Statement 90:</b> The person appears catatonic                                              | 42% | 21% | 4   | no consensus |
| Question 2 | <b>Statement 92:</b> The person appears to be experiencing fear of dogs or being chased        | 70% | 4%  | 3   | no consensus |
| Question 2 | <b>Statement 94:</b> The person is making incomprehensible sounds                              | 17% | 65% | 5   | no consensus |
| Question 2 | <b>Statement 95:</b> The person's speech is nonsensical                                        | 17% | 58% | 5   | no consensus |
| Question 2 | <b>Statement 96:</b> The person is exhibiting excessive thirst                                 | 25% | 46% | 4   | no consensus |
| Question 2 | <b>Statement 97:</b> The person has a dry mouth                                                | 29% | 17% | 4   | no consensus |
| Question 2 | <b>Statement 99:</b> The person is unresponsive to those present                               | 13% | 67% | 5   | no consensus |
| Question 2 | <b>Statement 102:</b> The person is tolerant of pain                                           | 8%  | 71% | 5   | no consensus |
| Question 2 | <b>Statement 104:</b> The person has bizarre or very weak responses to voice, touch or pain.   | 13% | 38% | 4   | no consensus |
| Question 2 | <b>Statement 106:</b> The person has darting or scanning eyes                                  | 58% | 13% | 3   | no consensus |
| Question 2 | <b>Statement 107:</b> The person has noisy breathing                                           | 46% | 33% | 4   | no consensus |

|            |                                                                                                                                                                          |     |     |   |              |
|------------|--------------------------------------------------------------------------------------------------------------------------------------------------------------------------|-----|-----|---|--------------|
| Question 2 | <b>Statement 108:</b> The person has tracheal tug (inward neck movement when breathing)                                                                                  | 74% | 13% | 3 | no consensus |
| Question 2 | <b>Statement 109:</b> The person has signs of airway obstruction                                                                                                         | 71% | 13% | 3 | no consensus |
| Question 2 | <b>Statement 110:</b> The person has stridor                                                                                                                             | 67% | 17% | 3 | no consensus |
| Question 2 | <b>Statement 111:</b> The person has hyper-rigidity                                                                                                                      | 29% | 54% | 5 | no consensus |
| Question 2 | <b>Statement 112:</b> The person has signs of a serious condition, such as sepsis, myocardial ischaemia or central neurological system infection.                        | 25% | 58% | 5 | no consensus |
| Question 2 | <b>Statement 114:</b> The person has a reduced level of consciousness                                                                                                    | 39% | 22% | 4 | no consensus |
| Question 2 | <b>Statement 119:</b> There should be no significant difference in the initial assessment for police, ambulance, custody healthcare staff or emergency department staff. | 67% | 17% | 3 | no consensus |
| Question 3 | <b>Statement 5:</b> Healthcare professionals are unlikely to be able to undertake formal clinical examination in presentations of ABD.                                   | 13% | 71% | 5 | no consensus |
| Question 3 | <b>Statement 14:</b> The person appears hyper vigilant                                                                                                                   | 8%  | 67% | 5 | no consensus |
| Question 3 | <b>Statement 20:</b> The person shows signs of confusion                                                                                                                 | 8%  | 71% | 5 | no consensus |
| Question 3 | <b>Statement 21:</b> The person has disordered thought content                                                                                                           | 13% | 71% | 5 | no consensus |
| Question 3 | <b>Statement 22:</b> The person's communicative abilities are compromised                                                                                                | 13% | 46% | 4 | no consensus |
| Question 3 | <b>Statement 26:</b> The person has a reduced level of consciousness                                                                                                     | 29% | 21% | 4 | no consensus |
| Question 3 | <b>Statement 29:</b> The person exhibits very weak or bizarre response to stimulus                                                                                       | 13% | 71% | 5 | no consensus |
| Question 3 | <b>Statement 30:</b> The person expresses an impending sense of death                                                                                                    | 21% | 29% | 4 | no consensus |
| Question 3 | <b>Statement 31:</b> The person is inappropriately dressed                                                                                                               | 30% | 26% | 4 | no consensus |
| Question 3 | <b>Statement 42:</b> The person has high blood pressure                                                                                                                  | 8%  | 58% | 5 | no consensus |
| Question 3 | <b>Statement 44:</b> The person has low blood pressure                                                                                                                   | 38% | 13% | 4 | no consensus |
| Question 3 | <b>Statement 45:</b> The person shows signs of dehydration                                                                                                               | 17% | 29% | 4 | no consensus |
| Question 3 | <b>Statement 46:</b> The person's has low blood oxygen levels                                                                                                            | 38% | 21% | 4 | no consensus |
| Question 3 | <b>Statement 47:</b> The person has dilated pupils                                                                                                                       | 17% | 42% | 4 | no consensus |
| Question 3 | <b>Statement 48:</b> The person has constricted pupils                                                                                                                   | 46% | 17% | 4 | no consensus |
| Question 3 | <b>Statement 49:</b> The person experiences a seizure                                                                                                                    | 17% | 71% | 5 | no consensus |
| Question 3 | <b>Statement 50:</b> The person has clonus                                                                                                                               | 17% | 71% | 6 | no consensus |

|            |                                                                                                                       |     |     |     |              |
|------------|-----------------------------------------------------------------------------------------------------------------------|-----|-----|-----|--------------|
| Question 3 | <b>Statement 51:</b> The person has increased tone                                                                    | 8%  | 63% | 5   | no consensus |
| Question 4 | <b>Statement 8:</b> The decision to move to alternative clinical guidance should not be made by custody staff.        | 22% | 48% | 4   | no consensus |
| Question 4 | <b>Statement 9:</b> The decision to move to alternative clinical guidance should not be made by ambulance staff.      | 57% | 13% | 3   | no consensus |
| Question 4 | <b>Statement 11:</b> The absence of the previously described signs of ABD on healthcare staff assessment.             | 9%  | 43% | 4   | no consensus |
| Question 4 | <b>Statement 14:</b> There is no evidence of acute on chronic stimulant use, nor mental health crisis.                | 25% | 25% | 4   | no consensus |
| Question 4 | <b>Statement 15:</b> The patient's presentation is improving.                                                         | 4%  | 70% | 5   | no consensus |
| Question 4 | <b>Statement 16:</b> The patient's severe agitation has resolved.                                                     | 4%  | 71% | 5   | no consensus |
| Question 4 | <b>Statement 18:</b> The risk of violence has resolved.                                                               | 8%  | 67% | 5   | no consensus |
| Question 4 | <b>Statement 19:</b> The patient does not have hyperthermia.                                                          | 17% | 54% | 5   | no consensus |
| Question 4 | <b>Statement 20:</b> The patient recognises they are injured.                                                         | 21% | 25% | 4   | no consensus |
| Question 4 | <b>Statement 21:</b> The patient's onset of behavioural disturbance is not acute (onset within hours).                | 13% | 38% | 4   | no consensus |
| Question 4 | <b>Statement 25:</b> Female gender makes a presentation of ABD much less likely.                                      | 26% | 26% | 4   | no consensus |
| Question 4 | <b>Statement 26:</b> The patient's age affects the likelihood that they are presenting with ABD.                      | 23% | 18% | 4   | no consensus |
| Question 4 | <b>Statement 28:</b> It is identified that the patient has chest pain                                                 | 33% | 33% | 4   | no consensus |
| Question 4 | <b>Statement 29:</b> It is identified that the patient has low blood pressure                                         | 21% | 21% | 4   | no consensus |
| Question 4 | <b>Statement 30:</b> It is identified that the patient has a prolonged capillary refill time                          | 30% | 17% | 4   | no consensus |
| Question 4 | <b>Statement 31:</b> A diagnosis of delirium is made                                                                  | 4%  | 67% | 5   | no consensus |
| Question 4 | <b>Statement 32:</b> It is identified that the patient has incoherent speech                                          | 17% | 21% | 4   | no consensus |
| Question 4 | <b>Statement 33:</b> It is identified that the patient is exhibiting violent behaviour (as opposed to just agitation) | 17% | 50% | 4.5 | no consensus |
| Question 5 | <b>Statement 4:</b> There are no features which are robustly predictive of negative outcomes                          | 42% | 21% | 4   | no consensus |
| Question 5 | <b>Statement 7:</b> Any restraint has been used                                                                       | 33% | 21% | 4   | no consensus |
| Question 5 | <b>Statement 24:</b> The person does not appear to tire                                                               | 8%  | 54% | 5   | no consensus |
| Question 5 | <b>Statement 29:</b> The person is exhibiting violent behaviour                                                       | 0%  | 71% | 5   | no consensus |
| Question 5 | <b>Statement 30:</b> The person is exhibiting unexpected strength                                                     | 13% | 58% | 5   | no consensus |



|            |                                                                                                                                     |     |     |     |              |
|------------|-------------------------------------------------------------------------------------------------------------------------------------|-----|-----|-----|--------------|
| Question 5 | <b>Statement 36:</b> The person has inappropriately removed clothing                                                                | 29% | 33% | 4   | no consensus |
| Question 5 | <b>Statement 37:</b> The person is inappropriately dressed                                                                          | 67% | 13% | 3   | no consensus |
| Question 5 | <b>Statement 60:</b> The person is attracted to mirrors or glass                                                                    | 63% | 13% | 3   | no consensus |
| Question 5 | <b>Statement 61:</b> The person is destroying mirrors or glass                                                                      | 71% | 13% | 3   | no consensus |
| Question 5 | <b>Statement 62:</b> The person expresses a fear of death                                                                           | 29% | 29% | 4   | no consensus |
| Question 5 | <b>Statement 65:</b> The person expresses an impending sense of death                                                               | 17% | 54% | 5   | no consensus |
| Question 5 | <b>Statement 68:</b> The person is unable to sit or stand still                                                                     | 8%  | 71% | 5   | no consensus |
| Question 5 | <b>Statement 69:</b> The person is unable to engage in conversation                                                                 | 13% | 29% | 4   | no consensus |
| Question 5 | <b>Statement 73:</b> The person is not listening to verbal commands                                                                 | 0%  | 33% | 4   | no consensus |
| Question 5 | <b>Statement 76:</b> The person appears paranoid                                                                                    | 4%  | 71% | 5   | no consensus |
| Question 5 | <b>Statement 79:</b> The person is tolerant of pain                                                                                 | 21% | 33% | 4   | no consensus |
| Question 6 | <b>Statement 4:</b> A patient who remains persistently agitated but there is no exertion or physiological derangement               | 4%  | 74% | 5   | no consensus |
| Question 6 | <b>Statement 12:</b> Person who is very aggressive                                                                                  | 21% | 29% | 4   | no consensus |
| Question 6 | <b>Statement 20:</b> Person inappropriately removes clothing                                                                        | 42% | 25% | 4   | no consensus |
| Question 6 | <b>Statement 25:</b> Person is attracted to mirrors or glass                                                                        | 70% | 9%  | 3   | no consensus |
| Question 6 | <b>Statement 26:</b> Person is destroying mirrors or glass                                                                          | 71% | 8%  | 2.5 | no consensus |
| Question 7 | <b>Statement 8:</b> Person with a moderately raised temperature.                                                                    | 39% | 9%  | 4   | no consensus |
| Question 7 | <b>Statement 12:</b> Person who will smoke.                                                                                         | 13% | 30% | 4   | no consensus |
| Question 7 | <b>Statement 13:</b> Person who has injuries which require assessment or treatment.                                                 | 30% | 35% | 4   | no consensus |
| Question 7 | <b>Statement 15:</b> There are no features which are robustly predictive of negative outcomes.                                      | 26% | 65% | 5   | no consensus |
| Question 7 | <b>Statement 16:</b> There are no features as we do not have a definition of ABD.                                                   | 73% | 5%  | 3   | no consensus |
| Question 8 | <b>Statement 2:</b> If the person begins to settle, this is not a presentation of ABD.                                              | 50% | 17% | 3.5 | no consensus |
| Question 8 | <b>Statement 3:</b> There are no features known to confer lower risk in ABD.                                                        | 21% | 63% | 5   | no consensus |
| Question 8 | <b>Statement 5:</b> Police custody would not be safe, the person with suspected ABD should always be taken to a healthcare setting. | 29% | 46% | 4   | no consensus |

|            |                                                                                                                                                                                                    |     |     |   |              |
|------------|----------------------------------------------------------------------------------------------------------------------------------------------------------------------------------------------------|-----|-----|---|--------------|
| Question 8 | <b>Statement 6:</b> Police custody would only be safe if there is a multidisciplinary decision to ensure safety to the person, or this is part of a monitoring agreement to attempt de-escalation. | 30% | 30% | 4 | no consensus |
| Question 8 | <b>Statement 7:</b> Police custody would be safe if police are able to regularly observe the person in a custody suite.                                                                            | 46% | 29% | 4 | no consensus |
| Question 8 | <b>Statement 8:</b> The person must be assessed in a healthcare setting and confirmation made by a healthcare professional that the person is able to be detained.                                 | 22% | 70% | 5 | no consensus |
| Question 8 | <b>Statement 10:</b> The person has previous history of the same presentation.                                                                                                                     | 70% | 0%  | 3 | no consensus |
| Question 8 | <b>Statement 16:</b> The person rests.                                                                                                                                                             | 9%  | 39% | 4 | no consensus |
| Question 8 | <b>Statement 17:</b> A National Early Warning Score of zero.                                                                                                                                       | 17% | 54% | 5 | no consensus |
| Question 8 | <b>Statement 18:</b> The person does not have low oxygen levels.                                                                                                                                   | 25% | 58% | 5 | no consensus |
| Question 8 | <b>Statement 19:</b> The person does not have periods of loss of consciousness                                                                                                                     | 17% | 58% | 5 | no consensus |
| Question 8 | <b>Statement 20:</b> The person does not have a temperature above 38 degrees Celcius                                                                                                               | 22% | 65% | 5 | no consensus |
| Question 8 | <b>Statement 21:</b> The increases in heart rate and/or respiratory rate are mild.                                                                                                                 | 17% | 63% | 5 | no consensus |
| Question 8 | <b>Statement 22:</b> The person stops sweating.                                                                                                                                                    | 17% | 25% | 4 | no consensus |
| Question 8 | <b>Statement 23:</b> The person's physical parameters are improving                                                                                                                                | 4%  | 74% | 5 | no consensus |
| Question 8 | <b>Statement 24:</b> There is an improvement in heart rate.                                                                                                                                        | 8%  | 71% | 5 | no consensus |
| Question 8 | <b>Statement 25:</b> There is an improvement in respiratory rate.                                                                                                                                  | 4%  | 71% | 5 | no consensus |
| Question 8 | <b>Statement 26:</b> There is an improvement in blood pressure.                                                                                                                                    | 8%  | 46% | 4 | no consensus |
| Question 8 | <b>Statement 27:</b> There is an improvement in temperature.                                                                                                                                       | 8%  | 54% | 5 | no consensus |
| Question 8 | <b>Statement 31:</b> The person's severe agitation is transient                                                                                                                                    | 8%  | 71% | 5 | no consensus |
| Question 8 | <b>Statement 36:</b> The person has no restraint related injuries.                                                                                                                                 | 17% | 48% | 4 | no consensus |
| Question 8 | <b>Statement 37:</b> The person becomes calmer with 2mg or less of lorazepam.                                                                                                                      | 58% | 17% | 3 | no consensus |
| Question 8 | <b>Statement 38:</b> The person is willing and able to take oral sedation.                                                                                                                         | 29% | 29% | 4 | no consensus |
